# Supplementary material for: East Timor as an important source of cashew ( Anacardium occidentale L.) genetic diversity
Source: PeerJ journal article supplement (doi:10.7717/peerj.14894), 2023-04-24
Supplement: Supplementary_Figure_S1.pdf [file Supplementary_Figure_S1.pdf]

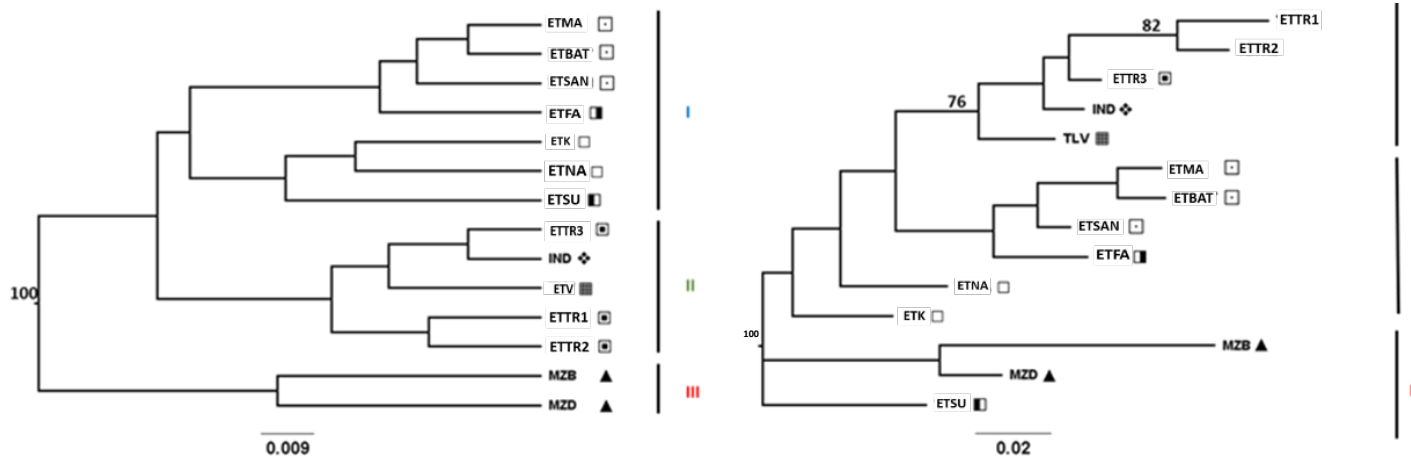

**Supplementary Figure S1.** UPGMA (A) and NJ (B) trees generated using matrix Nei's *D* distance, respectively, representing the [cashew populations](#) from East Timor, Indonesia, and Mozambique.

Legend: ◻ Manatuto, ◻ Bobonaro, ◻ Baucau, ◻ Covalima, ◻ Manufahi, ◻ Viqueque, ◻ Indonesia and ▲ Mozambique.

Formatou: Tipo de letra: Negrito

Formatou: Tipo de letra: Negrito

Eliminou: -

Eliminou: (
