# Supplementary material for: East Timor as an important source of cashew ( Anacardium occidentale L.) genetic diversity
Source: PeerJ journal article supplement (doi:10.7717/peerj.14894), 2023-04-24
Supplement: Supplementary_Figure_S2.pdf [file Supplementary_Figure_S2.pdf]

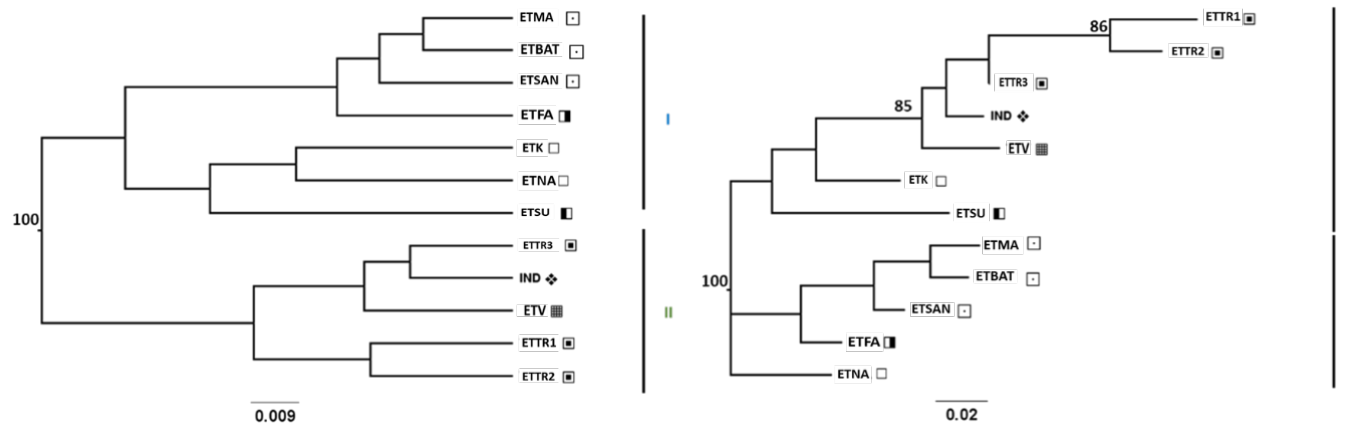

**Supplementary Figure S2.** UPGMA (A) and NJ (B) trees generated using matrix Nei's *D* distance, respectively, representing the [cashew populations of East Timor and Indonesia](#).

Legend: □ Manatuto, ◻ Bobonaro, ▣ Baucau, ▤ Covalima, ▥ Manufahi, ▦ Viqueque, and ⬠ Indonesia.

- Formatou: Tipo de letra: Negrito, Inglês (Estados Unidos)
- Formatou: Tipo de letra: Negrito
- Eliminou: from
- Eliminou: -
- Eliminou: ,
- Eliminou: (
- Eliminou: )
