# Supplementary material for: East Timor as an important source of cashew ( Anacardium occidentale L.) genetic diversity
Source: PeerJ journal article supplement (doi:10.7717/peerj.14894), 2023-04-24
Supplement: Supplementary_Figure_S3.pdf [file Supplementary_Figure_S3.pdf]

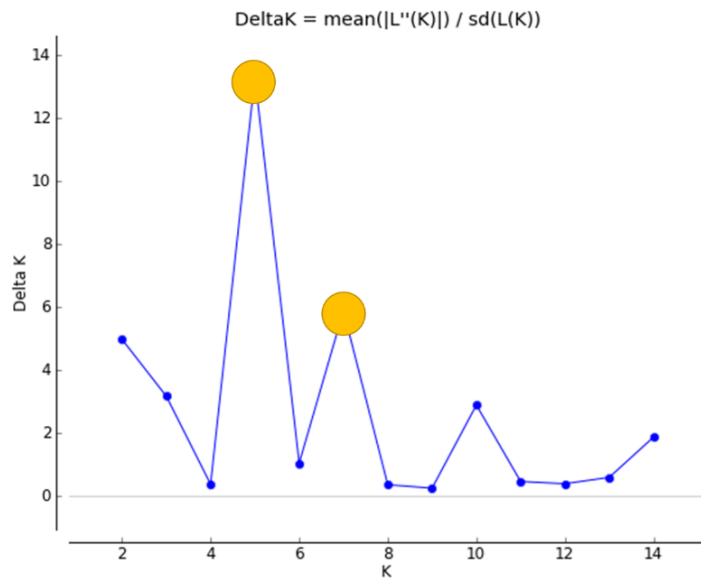

**Supplementary Figure S3.** STRUCTURE ad hoc statistics retrieved by Structure\_Harvester using 1 to 15 possible clusters ( $K$ ). Variation of  $\Delta K$  values according to [the method outlined by](#) Evanno et al. (2005) for populations from East Timor, Indonesia and Mozambique.

Eliminou: [41]

Eliminou: method

Eliminou: -
