# Supplementary material for: East Timor as an important source of cashew ( Anacardium occidentale L.) genetic diversity
Source: PeerJ journal article supplement (doi:10.7717/peerj.14894), 2023-04-24
Supplement: Supplementary_Figure_S4.pdf [file Supplementary_Figure_S4.pdf]

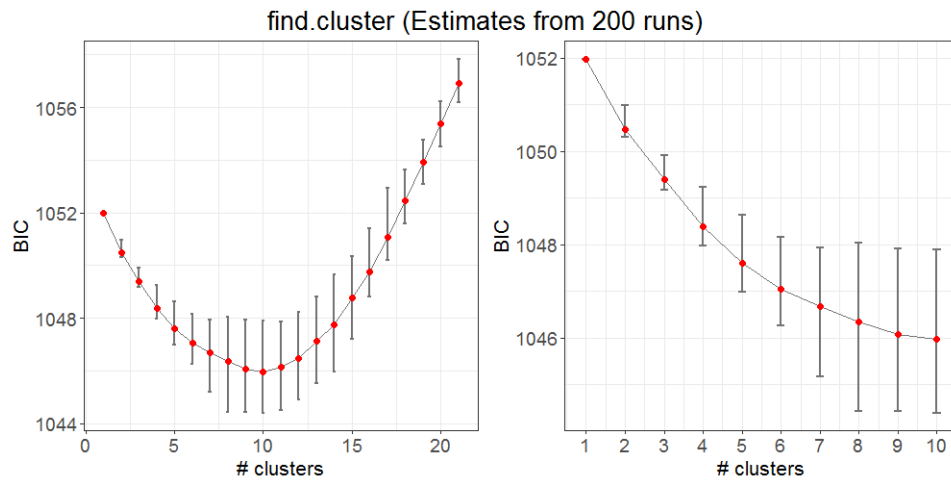

**Supplementary Figure S4.** DAPC results inference of the number of clusters using [the](#) *find.clusters* function with a  $K = 10$  (left) and  $K = 5$  (right). A  $K$  value of 10 (the lowest BIC value) represents the best summary of the data for the populations of East Timor, Indonesia, and Mozambique.

Eliminou:

Eliminou: -
