# Supplementary material for: East Timor as an important source of cashew ( Anacardium occidentale L.) genetic diversity
Source: PeerJ journal article supplement (doi:10.7717/peerj.14894), 2023-04-24
Supplement: Supplementary_Figure_S5.pdf [file Supplementary_Figure_S5.pdf]

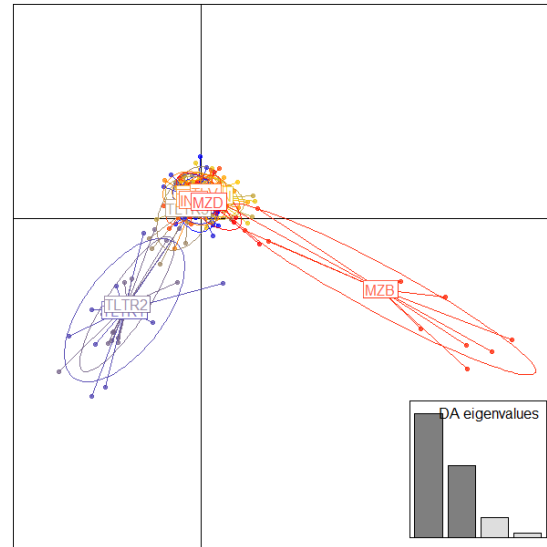

**Supplementary Figure S5.** Scatterplot of [the DAPC analysis of K = 5 assignment](#). Scatterplot shows the two principal components of the DAPC, and clusters are numbered and displayed by different colors, while dots represent individuals. The 2 Discriminant Functions hereby represented explain 93% of cumulative variance of the dataset

Eliminou: for
