# Supplementary material for: East Timor as an important source of cashew ( Anacardium occidentale L.) genetic diversity
Source: PeerJ journal article supplement (doi:10.7717/peerj.14894), 2023-04-24
Supplement: Supplementary_Figure_S6.pdf [file Supplementary_Figure_S6.pdf]

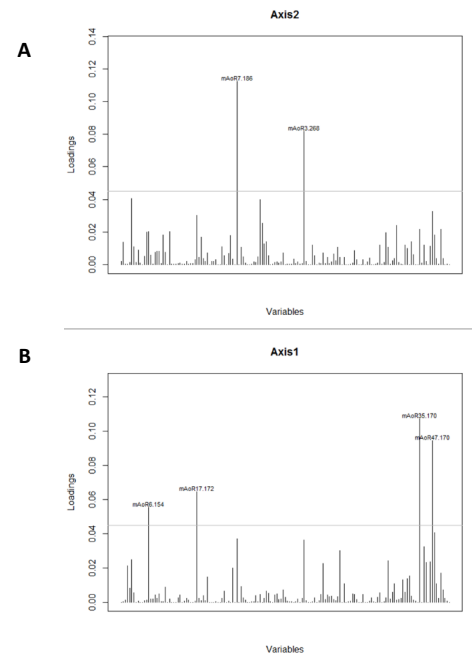

**Supplementary Figure S6.** Loading plots of the two discriminant functions following the DAPC analysis with a  $K = 5$ . **(A)** Allele loading plots from DF1 and **(B)** from DF2, after assigning a 0.045 as threshold.

Eliminou: D

Eliminou: F

Formatou: Tipo de letra: Negrito

Formatou: Tipo de letra: Negrito

Formatou: Inglês (Estados Unidos)
