# Supplementary material for: East Timor as an important source of cashew ( Anacardium occidentale L.) genetic diversity
Source: PeerJ journal article supplement (doi:10.7717/peerj.14894), 2023-04-24
Supplement: Supplementary_Figure_S7.pdf [file Supplementary_Figure_S7.pdf]

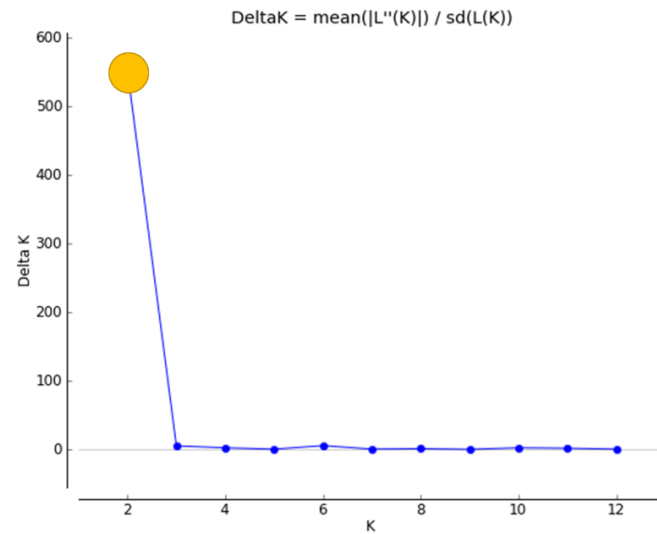

**Supplementary Figure S7.** STRUCTURE ad hoc statistics retrieved by Structure\_Harvester using 1 to 12 possible clusters ( $K$ ). Variation of  $\Delta K$  values according to [the method outlined by](#) Evanno *et al.* (2005) for populations from East Timor and Indonesia.

Eliminou: method  
 Eliminou: -
