# Supplementary material for: East Timor as an important source of cashew ( Anacardium occidentale L.) genetic diversity
Source: PeerJ journal article supplement (doi:10.7717/peerj.14894), 2023-04-24
Supplement: Supplementary_Figure_S8.pdf [file Supplementary_Figure_S8.pdf]

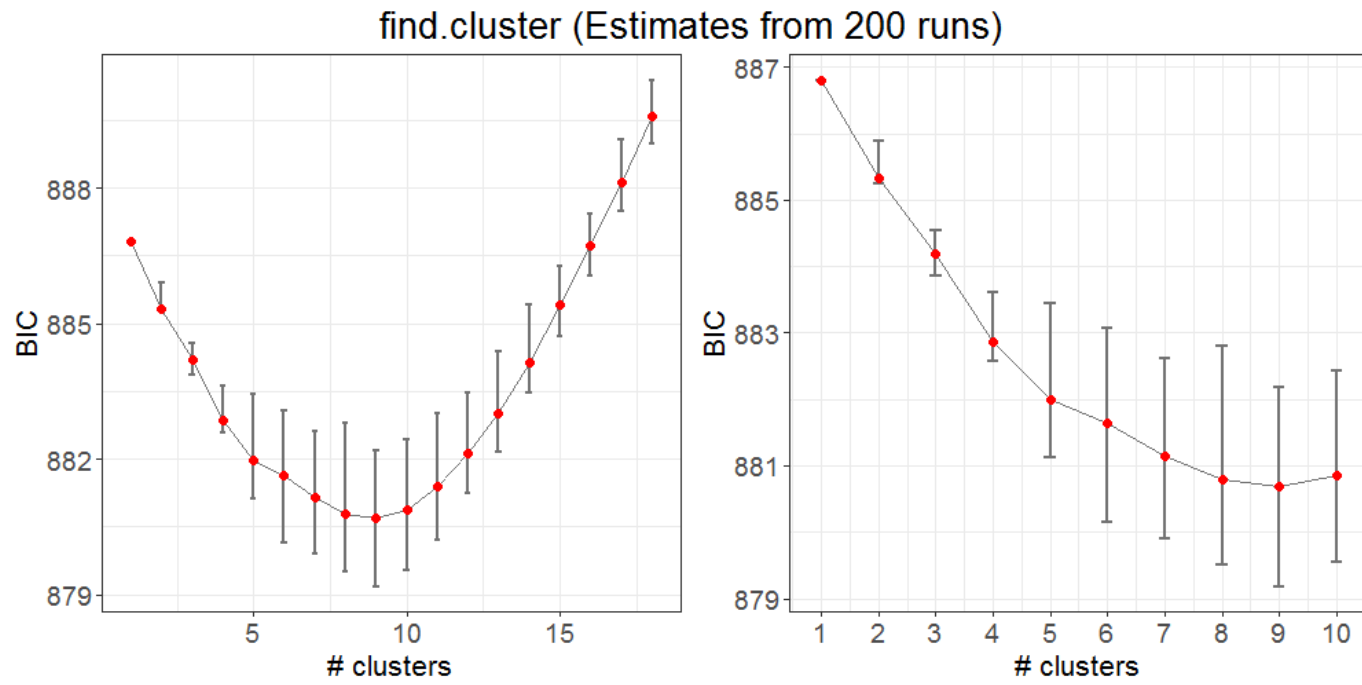

**Supplementary Figure S8.** Number of clusters inferred by [the](#) DAPC *find.clusters* function with a  $K = 5$  and  $K = 2$ .
