# Supplementary material for: East Timor as an important source of cashew ( Anacardium occidentale L.) genetic diversity
Source: PeerJ journal article supplement (doi:10.7717/peerj.14894), 2023-04-24
Supplement: Supplementary_Figure_S9.pdf [file Supplementary_Figure_S9.pdf]

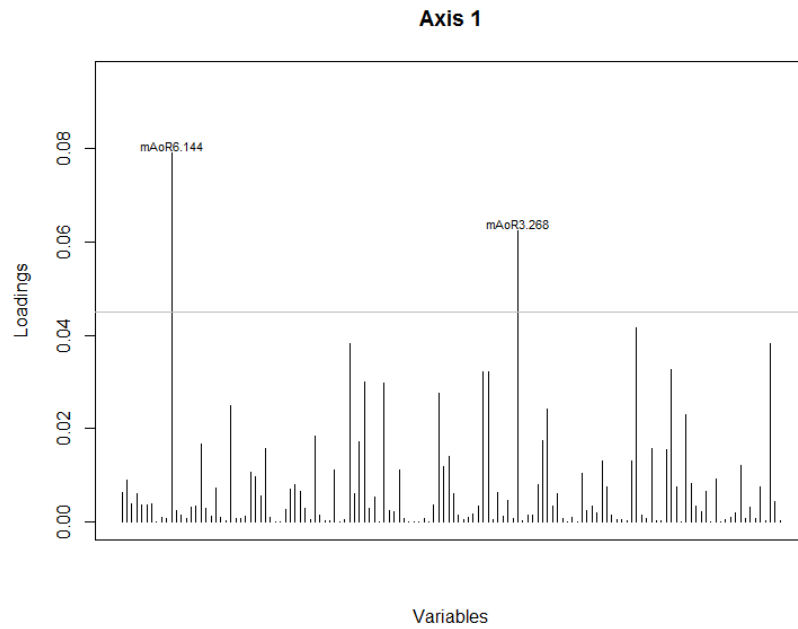

**Supplementary Figure S9.** Loading plot of the DF1 following [the](#) DAPC analysis with a  $K = 2$ , after assigning 0.045 as [the](#) threshold.

Eliminou: a
